# Supplementary material
Source: PubMed Central journal article supplement (PMC7415552)

# Supplementary Figure 1. Nested Graphs for Male CR Behaviors

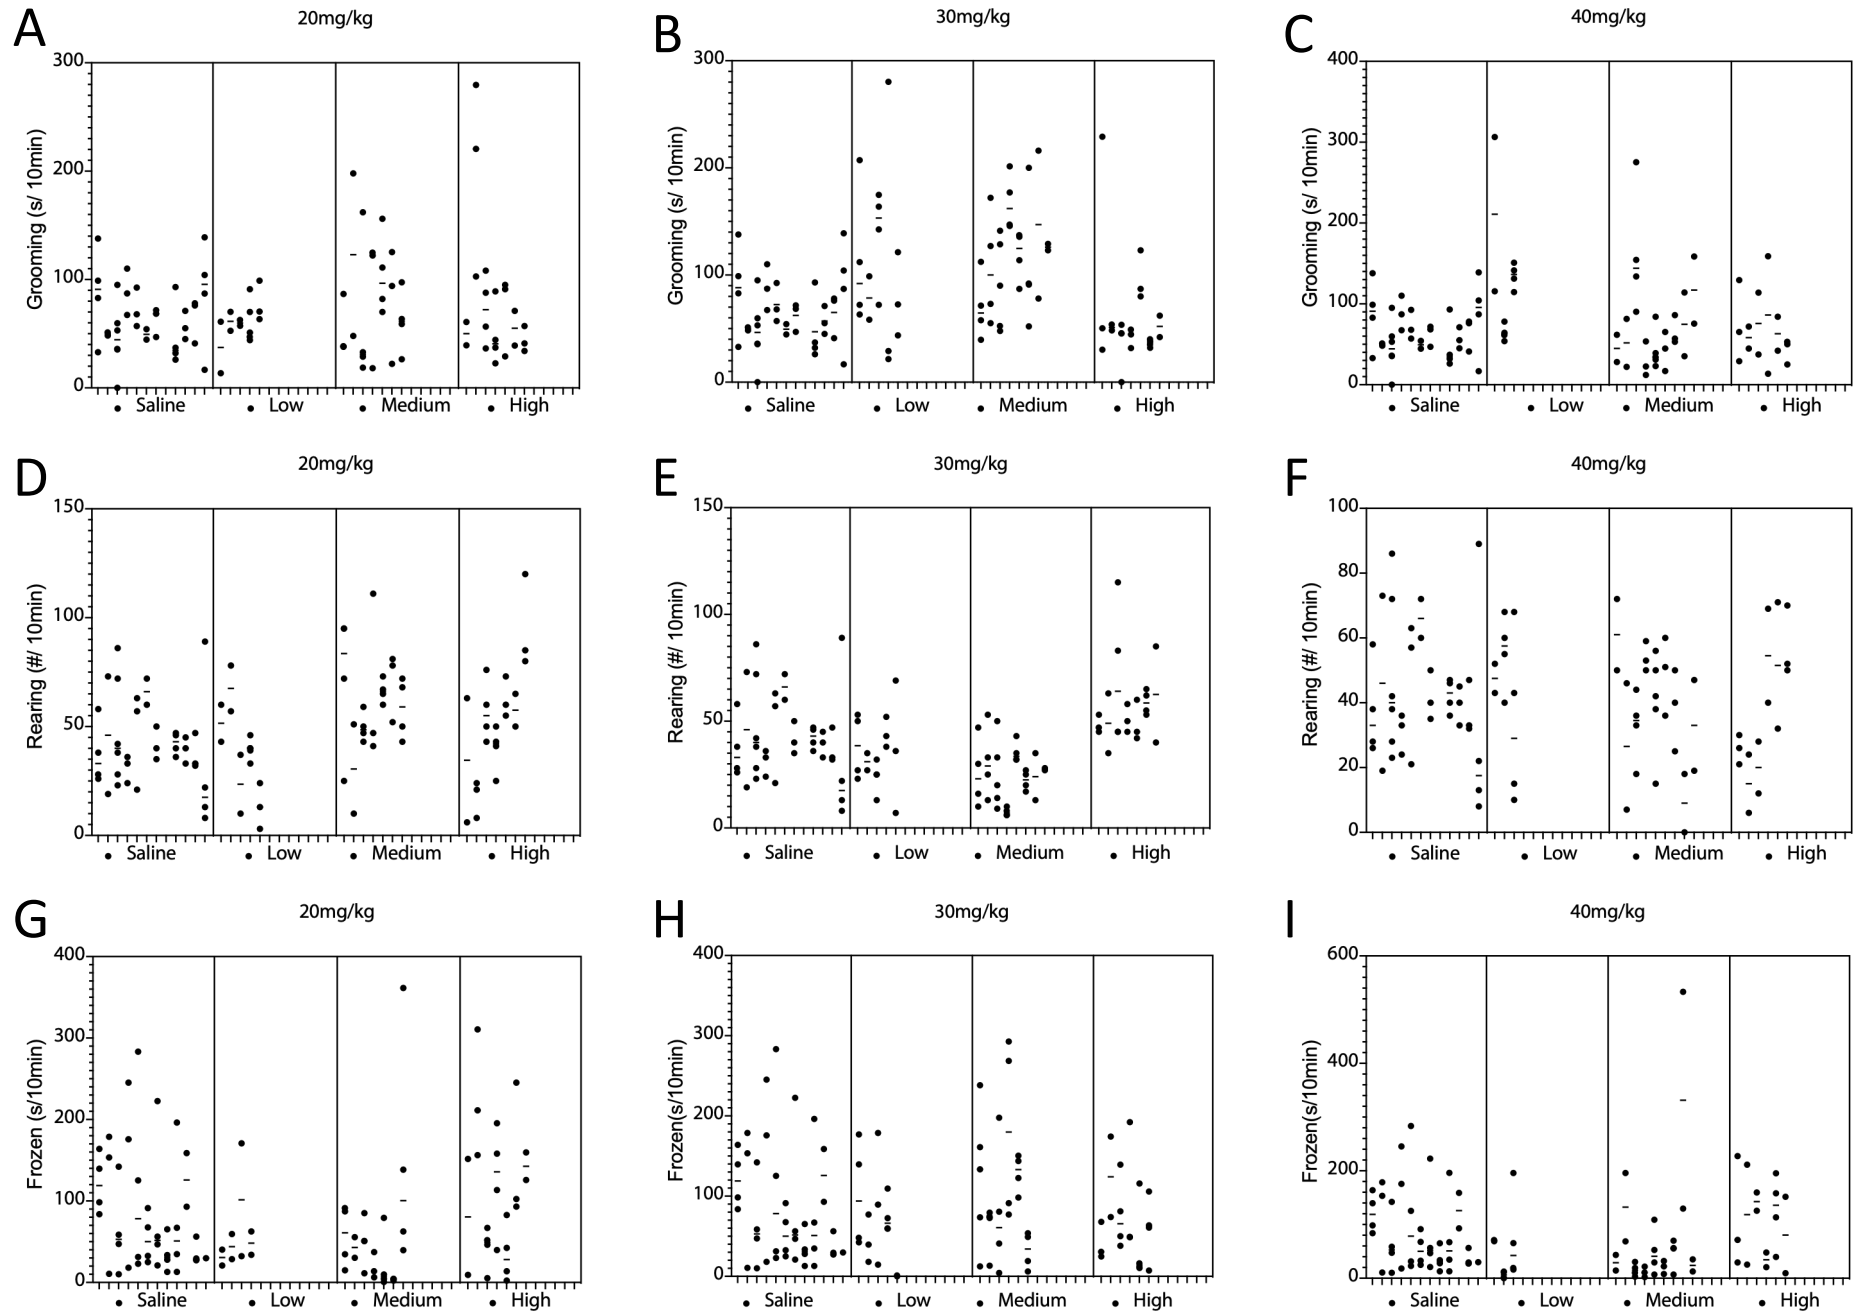



# Supplementary Figure 3. Nested Graphs for TAC Behaviors

## Male Offspring

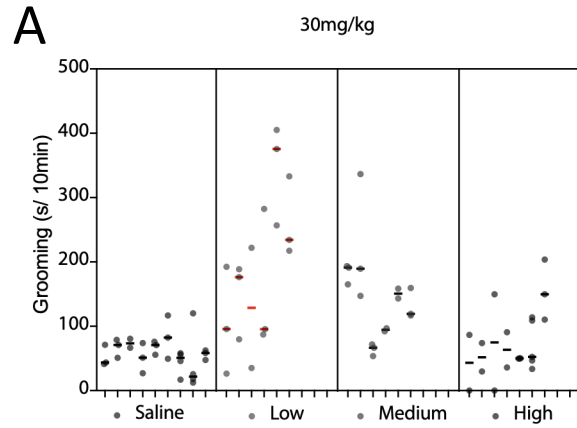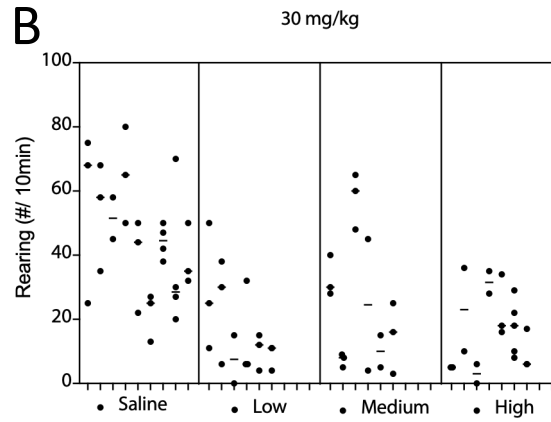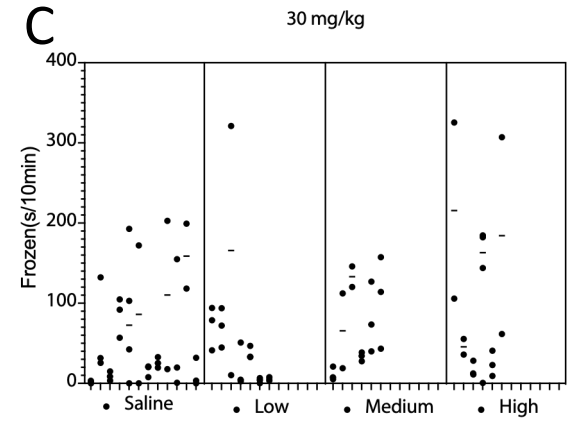

## Female Offspring

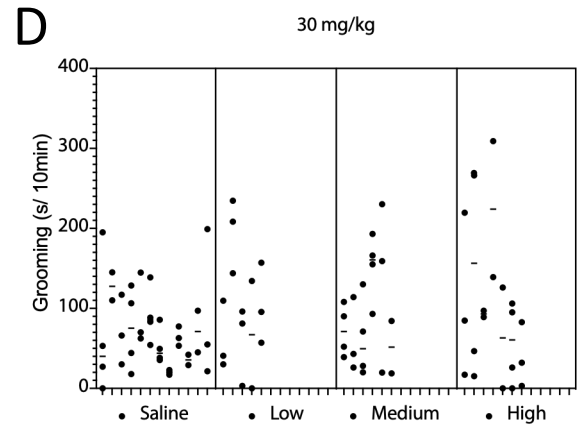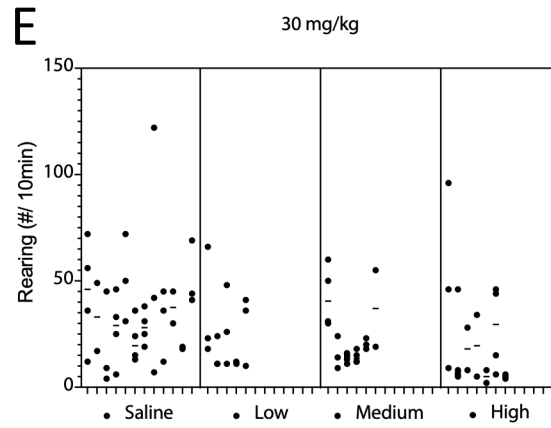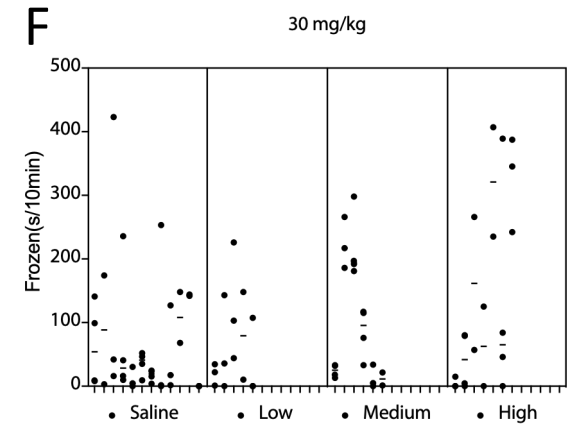

Supplement: NIHMS1592387-supplement-3.pdf [file NIHMS1592387-supplement-3.pdf]
